# Supplementary material for: The impact of iron deposition on the fear circuit of the brain in patients with Parkinson’s disease and anxiety
Source: PubMed Central journal article supplement (PMC9951615; doi:10.3389/fnagi.2023.1116516), 2023-02-09
Supplement: Data_Sheet_1.pdf [file Data_Sheet_1.pdf]

*Supplementary Material*

**Genetic and clinical analysis of *TP73* gene in amyotrophic  
lateral sclerosis patients from Chinese mainland**

**Xuxiong Tang<sup>1</sup>, Yanchun Yuan MD<sup>1</sup>, Zhen Liu MD<sup>1</sup>, Yue Bu<sup>1</sup>, Linxin Tang<sup>1</sup>,  
Qianqian Zhao<sup>1</sup>, Bin Jiao<sup>1.3.4.5.6</sup>, Jifeng Guo<sup>1.3.4.5.6</sup>, Lu Shen MD<sup>1.3.4.5.6</sup>, Hong Jiang  
MD<sup>1.2.3.4.5</sup>, Beisha Tang MD<sup>1.3.4.5.6</sup>, Junling Wang MD<sup>1.3.4.5.6\*</sup>**

\* **Correspondence:** Corresponding Author: [junling.wang@csu.edu.cn](mailto:junling.wang@csu.edu.cn)

**Supplementary Table 1.** Demographic characteristics of ALS patients and healthy controls

|                            | ALS group     | healthy controls group |
|----------------------------|---------------|------------------------|
| Patients with ALS, n       | 985           | 1224                   |
| Family history, n          | 69            | NA                     |
| Male, n (%)                | 685(69.54)    | 577(47.14)             |
| Age at onset, y            | 54.15 ± 10.76 | NA                     |
| Age at sampling, y         | 56.21 ± 11.39 | 68.47 ± 6.30           |
| Limb onset, n (%)          | 740(75.13)    | NA                     |
| Bulbar onset, n (%)        | 191(19.39)    | NA                     |
| Limb & bulbar onset, n (%) | 54(5.48)      | NA                     |

Abbreviations: ALS = amyotrophic lateral sclerosis; NA = data not available.

**Supplementary Table 2.** Details of rare, putative pathogenic variants in *TP73* identified in patients with ALS in this study

| Numbers of patients with ALS | <sup>a</sup> Chromosome position | dbSNP       | Exon | cDNA alteration | Amino acid change | Mutation type | Allele frequency gnomAD_EAS | Allele frequency ESP6500s_EAS | Allele frequency ExAC_EAS | Allele frequency 1000G_EAS | Functional predictions (pathogenic/total) |
|------------------------------|----------------------------------|-------------|------|-----------------|-------------------|---------------|-----------------------------|-------------------------------|---------------------------|----------------------------|-------------------------------------------|
| 1                            | chr1:3624113                     | -           | 4    | c.187G>A        | p.A63T            | Missense      | -                           | -                             | -                         | -                          | 5/11                                      |
| 1                            | chr1:3646593                     | rs146810167 | 11   | c.1226C>T       | p.P409L           | Missense      | -                           | -                             | -                         | -                          | 8/11                                      |
| 1                            | chr1:3649345                     | rs745542298 | 14   | c.1613G>A       | p.R538H           | Missense      | -                           | -                             | -                         | -                          | 11/11                                     |
| 1                            | chr1:3649360                     | rs779902863 | 14   | c.1628G>A       | p.R543Q           | Missense      | 8.56E-04                    | -                             | 8.00E-04                  | -                          | 11/11                                     |
| 1                            | chr1:3649411                     | rs139568604 | 14   | c.1679T>C       | p.L560P           | Missense      | 2.00E-04                    | 1.00E-04                      | 1.00E-04                  | -                          | 10/11                                     |
| 1                            | chr1:3649468                     | rs376429700 | 14   | c.1736G>A       | p.R579H           | Missense      | -                           | 1.00E-04                      | -                         | -                          | 9/11                                      |

Key: -, not present or zero; cDNA, complementary deoxyribonucleic acid; dbSNP, database of single nucleotide; gnomAD, genomes aggregation database; ESP6500s, the NHLBI Exome Sequencing Project; ExAC, the Exome Aggregation Consortium; 1000G, the 1000 Genome Project; <sup>a</sup> Position on Genome Reference Consortium human genome build 37 (GRCh37); transcript NM\_005427 has been used for TP73 variants nomenclature.

**Supplementary Table 3.** Function prediction of the identified rare, putative pathogenic variants in *TP73* by in-silico tools

| Variants               | SIFT                 | Polyphen<br>2<br>HDIV           | Polyphen<br>2<br>HVAR           | LRT                    | Mutation<br>taster        | Mutation<br>assessor | FATHM<br>M          | MetaSVM             | MetaLR              | MCAP                | CADD                 |
|------------------------|----------------------|---------------------------------|---------------------------------|------------------------|---------------------------|----------------------|---------------------|---------------------|---------------------|---------------------|----------------------|
| c.187G>A<br>(p.A63T)   | Tolerable<br>(0.435) | Benign<br>(0.376)               | Benign<br>(0.142)               | Unkno<br>wn<br>(0)     | Disease<br>Causing<br>(1) | Low<br>(1.1)         | Damaging<br>(-5.54) | Damaging<br>(0.605) | Damaging<br>(0.888) | Damaging<br>(0.717) | Tolerable<br>(10.66) |
| c.1226C>T<br>(p.P409L) | Tolerable<br>(0.108) | Possibly<br>damaging<br>(0.581) | Benign<br>(0.086)               | Delete<br>rious<br>(0) | Disease<br>Causing<br>(1) | Medium<br>(2.455)    | Damaging<br>(-5.73) | Damaging<br>(1.021) | Damaging<br>(0.936) | Damaging<br>(0.714) | Tolerable<br>(17.44) |
| c.1613G>A<br>(p.R538H) | Damaging<br>(0.002)  | Probably<br>damaging<br>(0.999) | Probably<br>damaging<br>(0.965) | Delete<br>rious<br>(0) | Disease<br>Causing<br>(1) | Medium<br>(2.295)    | Damaging<br>(-1.53) | Damaging<br>(1.072) | Damaging<br>(0.973) | Damaging<br>(0.649) | Damaging<br>(33)     |
| c.1628G>A<br>(p.R543Q) | Damaging<br>(0.007)  | Probably<br>damaging<br>(1)     | Probably<br>damaging<br>(0.997) | Delete<br>rious<br>(0) | Disease<br>Causing<br>(1) | Medium<br>(2.08)     | Damaging<br>(-1.8)  | Damaging<br>(1.095) | Damaging<br>(0.975) | Damaging<br>(0.645) | Damaging<br>(34)     |
| c.1679T>C<br>(p.L560P) | Damaging<br>(0.001)  | Probably<br>damaging<br>(0.993) | Possibly<br>damaging<br>(0.882) | Delete<br>rious<br>(0) | Disease<br>Causing<br>(1) | Low<br>(1.585)       | Damaging<br>(-6.54) | Damaging<br>(1.057) | Damaging<br>(0.977) | Damaging<br>(0.905) | Damaging<br>(24.6)   |
| c.1736G>A<br>(p.R579H) | Tolerable<br>(0.154) | Probably<br>damaging            | Probably<br>damaging            | Delete<br>rious        | Disease<br>Causing        | Low<br>(0.975)       | Damaging<br>(-2.98) | Damaging<br>(0.681) | Damaging<br>(0.783) | Damaging<br>(0.339) | Damaging<br>(26.9)   |

(1) (0.999) (0) (1)

---

SIFT, Sorting Intolerant from Tolerant; PolyPhen2 HDIV, Polymorphism Phenotyping Version 2 Human Diversity; PolyPhen2 HVAR, Polymorphism Phenotyping Version 2 Human Variation; LRT, likelihood ratio test; FATHMM, functional analysis through hidden Markov models; SVM, support vector machine; LR, logistic regression; MCAP, Mendelian clinically applicable pathogenicity; CADD, combined annotation dependent depletion.

**Supplementary Table 4.** List of the known ALS genes included in this study

|                 |                |               |                |               |                |                |                  |               |                |
|-----------------|----------------|---------------|----------------|---------------|----------------|----------------|------------------|---------------|----------------|
| <i>ALS2</i>     | <i>ANG</i>     | <i>ANXA11</i> | <i>ATP13A2</i> | <i>ATXN2</i>  | <i>CACNA1H</i> | <i>CCNF</i>    | <i>CHCHD10</i>   | <i>CHMP2B</i> | <i>C9orf72</i> |
| <i>C19orf12</i> | <i>C21orf2</i> | <i>DAO</i>    | <i>DCTN1</i>   | <i>DJI</i>    | <i>DNAJC7</i>  | <i>ELP3</i>    | <i>ERBB4</i>     | <i>ERLIN1</i> | <i>EWSR1</i>   |
| <i>FIG4</i>     | <i>FUS</i>     | <i>GARS</i>   | <i>GLE1</i>    | <i>GLT8D1</i> | <i>GRN</i>     | <i>hnRNPA1</i> | <i>hnRNPA2B1</i> | <i>KIF5A</i>  | <i>MATR3</i>   |
| <i>NEFH</i>     | <i>OPTN</i>    | <i>PFN1</i>   | <i>PRPH</i>    | <i>SETX</i>   | <i>SIGMAR1</i> | <i>SOD1</i>    | <i>SPG11</i>     | <i>SQSTM1</i> | <i>SS18L1</i>  |
| <i>SYNE1</i>    | <i>TAF15</i>   | <i>TARDBP</i> | <i>TBK1</i>    | <i>TIA1</i>   | <i>TUBA4A</i>  | <i>UBQLN2</i>  | <i>VAPB</i>      | <i>VCP</i>    | <i>VRK1</i>    |

**Supplementary Table 5.** 36 common *TP73* variants identified in our cohort

| Position     | Ref | Alt | dbSNP       | Frequency  | N    | P-value    | P*-value   | SE         |
|--------------|-----|-----|-------------|------------|------|------------|------------|------------|
| Chr1:3644349 | A   | G   | rs2181486   | 0.30149389 | 2209 | 0.00199664 | 0.03593952 | 0.01683281 |
| Chr1:3644374 | A   | G   | rs2146657   | 0.29968312 | 2209 | 0.0022571  | 0.04062775 | 0.01687655 |
| Chr1:3646214 | T   | C   | rs1885866   | 0.29877773 | 2209 | 0.00575586 | 0.1036055  | 0.01684254 |
| Chr1:3646192 | G   | A   | rs1885867   | 0.29311906 | 2209 | 0.00857987 | 0.15443771 | 0.0169878  |
| Chr1:3646291 | G   | A   | rs1885865   | 0.29311906 | 2209 | 0.00857987 | 0.15443771 | 0.0169878  |
| Chr1:3644085 | G   | A   | rs10910017  | 0.24671797 | 2209 | 0.02850752 | 0.51313531 | 0.01814686 |
| Chr1:3645835 | C   | A   | rs2254530   | 0.24603893 | 2209 | 0.03338934 | 0.60100814 | 0.01820651 |
| Chr1:3646137 | C   | T   | rs11589885  | 0.24694432 | 2209 | 0.04319402 | 0.77749241 | 0.01820831 |
| Chr1:3599514 | C   | T   | rs57596460  | 0.1505206  | 2209 | 0.07127521 | 1.28295385 | 0.02108407 |
| Chr1:3647712 | C   | G   | rs60679866  | 0.01697601 | 2209 | 0.07472362 | 1.34502516 | 0.05799175 |
| Chr1:3643927 | A   | G   | rs2296031   | 0.04572205 | 2209 | 0.08335518 | 1.50039331 | 0.03600314 |
| Chr1:3599750 | TG  | T   | rs796864922 | 0.15119964 | 2209 | 0.09385085 | 1.68931526 | 0.02102851 |
| Chr1:3644669 | C   | T   | rs2236367   | 0.04594839 | 2209 | 0.10051872 | 1.80933687 | 0.03593396 |
| Chr1:3644858 | G   | C   | rs2236365   | 0.04594839 | 2209 | 0.10051872 | 1.80933687 | 0.03593396 |
| Chr1:3607520 | G   | A   | rs3765730   | 0.3809416  | 2209 | 0.12143417 | 2.18581497 | 0.01544944 |
| Chr1:3649562 | G   | A   | rs9662633   | 0.24060661 | 2209 | 0.19127173 | 3.44289114 | 0.01867316 |
| Chr1:3649403 | G   | A   | rs61735051  | 0.24083296 | 2209 | 0.20527194 | 3.69489494 | 0.01867745 |
| Chr1:3607355 | G   | A   | rs3765729   | 0.02716161 | 2209 | 0.21506371 | 3.87114674 | 0.04589154 |
| Chr1:3649802 | G   | C   | rs370630845 | 0.01425985 | 2209 | 0.22895067 | 4.12111204 | 0.06204869 |

|              |   |   |             |            |      |            |            |            |
|--------------|---|---|-------------|------------|------|------------|------------|------------|
| Chr1:3649794 | A | C | rs9659687   | 0.2410593  | 2209 | 0.24811144 | 4.46600587 | 0.01864784 |
| Chr1:3649805 | A | G | rs9659688   | 0.24015392 | 2209 | 0.25362429 | 4.56523726 | 0.01866876 |
| Chr1:3644715 | C | T | rs12046074  | 0.24241738 | 2209 | 0.26832466 | 4.82984379 | 0.01855181 |
| Chr1:3644754 | T | C | rs12048341  | 0.24264373 | 2209 | 0.28573005 | 5.1431409  | 0.01854978 |
| Chr1:3638674 | C | T | rs1801174   | 0.48008149 | 2209 | 0.30510141 | 5.49182534 | 0.01524056 |
| Chr1:3647962 | T | C | rs1745813   | 0.48868266 | 2209 | 0.30567676 | 5.50218164 | 0.01550837 |
| Chr1:3647877 | T | C | rs7517037   | 0.2376641  | 2209 | 0.37186674 | 6.69360137 | 0.0186552  |
| Chr1:3647419 | G | A | rs41301973  | 0.23856949 | 2209 | 0.39918478 | 7.18532599 | 0.01865499 |
| Chr1:3647944 | C | A | rs12569205  | 0.23675871 | 2209 | 0.41471616 | 7.46489088 | 0.01868184 |
| Chr1:3598899 | C | T | rs5031052   | 0.01561793 | 2209 | 0.45415556 | 8.1748001  | 0.05950327 |
| Chr1:3645844 | G | A | rs2096224   | 0.48755093 | 2209 | 0.47273569 | 8.5092424  | 0.01555619 |
| Chr1:3638834 | C | T | rs12737840  | 0.01041195 | 2209 | 0.69104807 | 12.4388652 | 0.07339325 |
| Chr1:3644805 | A | G | rs2236366   | 0.28927116 | 2209 | 0.79752905 | 14.3555228 | 0.0173858  |
| Chr1:3607606 | C | A | rs3819957   | 0.03440471 | 2209 | 0.82591128 | 14.866403  | 0.04140877 |
| Chr1:3638822 | G | A | rs370902308 | 0.02195564 | 2209 | 0.85129702 | 15.3233463 | 0.04982306 |
| Chr1:3598910 | C | T | rs1801173   | 0.22159348 | 2209 | 0.94617928 | 17.0312271 | 0.01781955 |
| Chr1:3598900 | G | A | rs2273953   | 0.22114079 | 2209 | 0.96812498 | 17.4262497 | 0.01783139 |

Abbreviations: Chr: chromosome; Ref: reference allele; Alt: alternate allele; dbSNP: dbSNP137 (<https://www.ncbi.nlm.nih.gov/snp/>); N: number of subjects in this study; P\*-value: P-value after the Bonferroni correction; SE: standard error



**Supplementary Table 6.** Block statistics of the 24 common variants

|         | CHR | Genomic region<br>of block (bp) | Total length (kb) | block | No.of SNPs in<br>blocks(n) | SNPs                                                                                                                           |
|---------|-----|---------------------------------|-------------------|-------|----------------------------|--------------------------------------------------------------------------------------------------------------------------------|
| Block 1 | 1   | 3598900 -<br>3598910            | 0.011             | 2     |                            | rs2273953 rs1801173                                                                                                            |
| Block 2 | 1   | 3599514 -<br>3599750            | 0.237             | 2     |                            | rs57596460 rs796864922                                                                                                         |
| Block 3 | 1   | 3638674 -<br>3644085            | 5.412             | 2     |                            | rs1801174 rs10910017                                                                                                           |
| Block 4 | 1   | 3644349 -<br>3644374            | 0.026             | 2     |                            | rs2181486 rs2146657                                                                                                            |
| Block 5 | 1   | 3644715 -<br>3645835            | 1.121             | 4     |                            | rs12046074 rs12048341 rs2236366 rs2254530                                                                                      |
| Block 6 | 1   | 3646137 -<br>3649805            | 3.669             | 12    |                            | rs11589885 rs1885867 rs1885866 rs1885865 rs41301973 rs7517037<br>rs12569205 rs1745813 rs61735051 rs9662633 rs9659687 rs9659688 |

Abbreviations: Chr: chromosome; SNP: single nucleotide polymorphism; No.of SNPs in blocks(n): the number of SNPs in the block

**Supplementary Table 7.** Burden analysis of rare variants across different genome regions of the *TP73* gene (the frequency of carriers <0.01 in all participants)

| Genome region          | P-value |
|------------------------|---------|
| Coding regions         | 1       |
| Untranslated regions   | 0.0461  |
| Intron-exon boundaries | 0.5710  |

**Supplementary Table 8.** nine rare *TP73* variants detected in the control group in our study

| Numbers. of healthy controls | <sup>a</sup> Chromosome position | dbSNP       | Exon | cDNA alteration | Amino acid change | Mutation type          | Allele frequency gnomAD_EAS | Allele frequency ExAC_EAS | Functional predictions (pathogenic/total) |
|------------------------------|----------------------------------|-------------|------|-----------------|-------------------|------------------------|-----------------------------|---------------------------|-------------------------------------------|
| 1                            | chr1:3598961                     | rs192866394 | 2    | c.32G>T         | p.G11V            | Missense               | 0                           | 0                         | 5/11                                      |
| 1                            | chr1:3624261                     | rs377337435 | 4    | c.335C>T        | p.A112V           | Missense               | 5.80E-05                    | 0.0001                    | 10/11                                     |
| 1                            | chr1:3644212                     | rs528016587 | 8    | c.863G>A        | p.R288Q           | Missense               | 6.28E-05                    | 0                         | 9/11                                      |
| 2                            | chr1:3644710                     | rs746096915 | 9    | c.1003C>A       | p.P335T           | Missense               | 5.81E-05                    | 0.0001                    | 6/11                                      |
| 1                            | chr1:3644739                     | rs755720136 | 9    | c.1032_1034del  | p.344_345del      | nonframeshift deletion | 0.0001                      | 0.0002                    | -                                         |
| 1                            | chr1:3645909                     | -           | 10   | c.1093T>C       | p.F365L           | Missense               | -                           | -                         | 10/11                                     |
| 1                            | chr1:3648047                     | -           | 13   | c.1505G>A       | p.C502Y           | Missense               | -                           | -                         | 10/11                                     |
| 1                            | chr1:3648116                     | rs770506799 | 13   | c.1574T>C       | p.I525T           | Missense               | 5.80E-05                    | 0                         | 5/11                                      |
| 1                            | chr1:3649446                     | rs775611773 | 14   | c.1714G>A       | p.G572S           | Missense               | 0                           | 0                         | 9/11                                      |

Key: -, not present or zero; cDNA, complementary deoxyribonucleic acid; dbSNP, database of single nucleotide; gnomAD, genomes aggregation database; ESP6500s, the NHLBI Exome Sequencing Project; ExAC, the Exome Aggregation Consortium; 1000G, the 1000 Genome Project; <sup>a</sup> Position on Genome Reference Consortium human genome build 37 (GRCh37); transcript NM\_005427 has been used for *TP73* variants nomenclature.

Supplementary Figure 1. Brain MRI of Patient S0423 and S4096

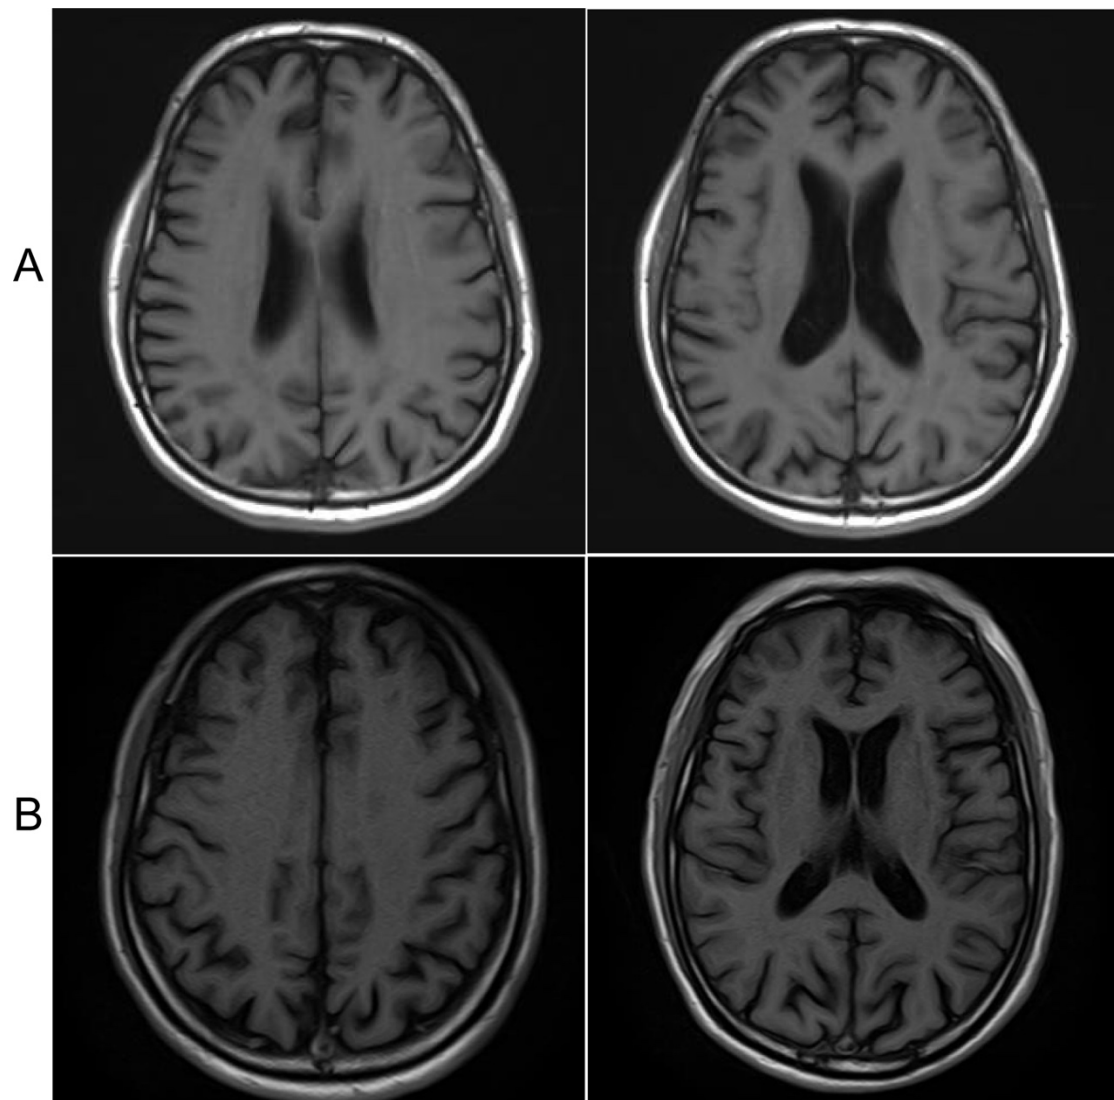

A. Brain MRI of patient A0423

B. Brain MRI of patient S4096
